# Supplementary figures and images for: Sorption behavior of tylosin and sulfamethazine on humic acid: kinetic and thermodynamic studies
Source: Royal Society of Chemistry journal article supplement (doi:10.1039/c5ra08684a), 2015-01-01

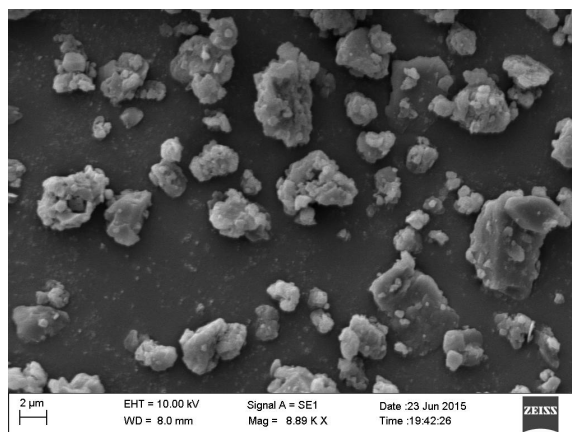

Fig. 1 SEM images of HA

Supplement: c5ra08684a1.pdf [file c5ra08684a1.pdf]
